# Supplementary material for: EasyPrimer: user-friendly tool for pan-PCR/HRM primers design. Development of an HRM protocol on wzi gene for fast Klebsiella pneumoniae typing
Source: PubMed Central journal article supplement (PMC6987216; doi:10.1038/s41598-020-57742-z), 2020-01-28
Supplement: 41598_2020_57742_MOESM1_ESM.pdf [file 41598_2020_57742_MOESM1_ESM.pdf]

Supplementary Information of:

## **EasyPrimer: user-friendly tool for pan-PCR/HRM primers design. Development of an HRM protocol on *wzi* gene for fast *Klebsiella pneumoniae* typing.**

**Matteo Perini<sup>1</sup>, Aurora Piazza<sup>1</sup>, Simona Panelli<sup>1</sup>, Domenico Di Carlo<sup>1</sup>, Marta Corbella<sup>2</sup>,  
Floriana Gona<sup>3</sup>, Francesca Vailati<sup>4</sup>, Piero Marone<sup>2</sup>, Daniela Maria Cirillo<sup>3</sup>, Claudio  
Farina<sup>4</sup>, Gianvincenzo Zuccotti<sup>1,5</sup>, Francesco Comandatore<sup>\*,1</sup>**

<sup>1</sup>Department of Biomedical and Clinical Sciences “L. Sacco”, Università di Milano, Pediatric Clinical Research Center “Romeo and Enrica Invernizzi”, Milan, 20157, Italy

<sup>2</sup>S.C. Microbiologia e Virologia, Fondazione IRCCS Policlinico San Matteo, Pavia, 27100, Italy

<sup>3</sup>Emerging Bacterial Pathogens Unit, Division of Immunology, Transplantation and Infectious Diseases, IRCCS San Raffaele Scientific Institute, Milan, 20132, Italy

<sup>4</sup>Microbiology Institute, A.S.S.T. "Papa Giovanni XXIII", Bergamo, 24127, Italy

<sup>5</sup>Department of Pediatrics, V. Buzzi Childrens' Hospital, Università di Milano, Milan, Italy.

[\\*francesco.comandatore@unimi.it](mailto:francesco.comandatore@unimi.it)

## Supplementary Note S1. The EasyPrimer algorithm.

EasyPrimer is a Python-R pipeline to assist the primer design procedure. It was developed to identify the best regions to design primers in an alignment. Indeed, the tool finds the best “primer-amplicon-primer” gene region, where two highly conserved gene regions (suggested for primer design) flank a highly variable region (the “amplicon region”).

The algorithm scans the alignment to find - at least - one highly variable region (amplicon region) flanked by two conserved regions (primer regions). For the computation of the highly variable region, the user can decide to consider all the Single Nucleotide Polymorphism (SNPs) or only the HRM-detectable ones (HRM-SNP): a HRM-SNP is a SNP that confers a change in CG content (i.e., any A↔G or T↔G or A↔C or T↔G counts as a HRM-SNP). EasyPrimer will identify the most HRM discriminatory region in the alignment when HRM SNPs are used to score the variability of the amplicon region. Conversely, considering all the SNPs the tool will identify the most variable region in general. Additionally, the user provides length ranges both for primers and amplicon, the tool suggests regions for primer design with a reasonable spacing, meaning that they always amplify a region of optimal length.

The main EasyPrimer output is a graph (plotted in a PDF file) in which the alignment consensus sequence is reported on the x-axes and the information about the positions of the best primer/amplicon regions are represented with blue and red curves.

### The algorithm:

The inputs of the tool are:

- i) A Fasta sequence of the gene to be analysed;
- ii) A minimum and a maximum nucleotide length allowed for the primers and the amplicon;
- iii) A percentile threshold of variability for primers selection (see below);
- iv) A percentile threshold of variability for amplicon selection (see below);
- v) A consensus threshold value (see below);

The steps are the following:

1. Aligning the gene sequences using the MUSCLE software (Multiple Sequence Comparison by Log- Expectation)<sup>1</sup>
2. Computing, for each position of the alignment, the frequencies of A, T, C, G and gaps
3. Computing for each position the information of the entropy using Shannon index on the basis of A, T, C, G and gaps frequencies as follows:

$$H' = [f_A \times \log(f_A)] + [f_T \times \log(f_T)] + [f_C \times \log(f_C)] + [f_G \times \log(f_G)] + [f_{gaps} \times \log(f_{gaps})]$$

4. Estimating the frequency of mutation among strains. If the user decided to use all the possible SNPs to evaluate the amplicon variability the score is calculated as follows:

$$f_{SNP} = \frac{(f_A \times f_G) + (f_T \times f_G) + (f_A \times f_C) + (f_T \times f_C) + (f_A \times f_T) + (f_G \times f_C)}{\text{amplicon length}}$$

Otherwise, if the user decided to work with HRM-SNPs only the formula becomes:

$$f_{HRM} = \frac{(f_A \times f_G) + (f_T \times f_G) + (f_A \times f_C) + (f_T \times f_C)}{\text{amplicon length}}$$

5. For each possible combination of primers and amplicon lengths a window composed by primer-amplicon-primer sections is generated and shifted on the sequence alignment. For each window position, the average  $H'$  is calculated for the primer regions and the average  $f_{HRM}$  or  $f_{SNP}$  is calculated for the amplicon region
6. Selection of the windows with total  $H'$  below the primer percentile threshold in the primer region and  $f_{HRM}$  or  $f_{SNP}$  above the amplicon percentile threshold in the amplicon region.
7. The consensus of the alignment is obtained
8. The results are plotted on a graph in which the consensus sequence is reported on the x-axes and blue/red lines are obtained as follows: for each alignment position, the frequency of selected windows for which the position is included in the primer section is represented in blue, while the frequency for which the position is included in the amplicon section is represented in red

#### Notes on the consensus notation:

The consensus sequence is written the IUPAC notation for DNA both for the bases and the degenerated residues. some symbols and notation were added to give more information:

- Red residues are added to indicate in the consensus sequence that gaps in the alignment in that position are greater than consensus threshold (more than 5% in default) and less than 1 - consensus threshold (less than 95% in default).
- Asterisks (\*) indicate a gap present more than 1 - consensus threshold (more than 95% in defaults), this indicate an insertion in one or few variances in the gene. The user will probably want to consider that position as 'not existing' during the primer design process

The algorithm is summarized in the flow diagram in Figure S7.

#### Reference:

1. Edgar, R. C. MUSCLE: multiple sequence alignment with high accuracy and high throughput. *Nucleic Acids Res.* **32**, 1792–1797 (2004).

**Table S1.** List of all the melting temperatures obtained during the HRM analyses for all the strains and for all the primer sets.

| Strain name | MLST profile | Gene name   | Primer pair name | Melting T 1 (°C) | Melting T 2 (°C) | Melting T 3 (°C) | Average melting T (°C) |
|-------------|--------------|-------------|------------------|------------------|------------------|------------------|------------------------|
| 15PV        | ST976        | <i>infB</i> | <i>infB-1</i>    | 84               | 84               | 84               | 84                     |
| 15PV        | ST976        | <i>mdh</i>  | <i>mdh-1</i>     | 80.5             | 80.5             | 80.5             | 80.5                   |
| 15PV        | ST976        | <i>phoE</i> | <i>phoE-1</i>    | 80               | 80               | 80               | 80                     |
| 15PV        | ST976        | <i>rpoB</i> | <i>rpoB-1</i>    | 83.5             | 83.5             | 83               | 83.3                   |
| 15PV        | ST976        | <i>tonB</i> | <i>tonB-1</i>    | 86.5             | 86.5             | 86               | 86.3                   |
| 15PV        | ST976        | <i>tonB</i> | <i>tonB-2</i>    | 89               | 89               | 89               | 89                     |
| 15PV        | ST976        | <i>gapA</i> | <i>gapA-1</i>    | 84.5             | 84.5             | 84.5             | 84.5                   |
| 15PV        | ST976        | <i>pgi</i>  | <i>pgi-1</i>     | 86               | 86               | 86               | 86                     |
| 15PV        | ST976        | <i>wzi</i>  | <i>wzi-3</i>     | 85               | 85               | 85               | 85                     |
| 15PV        | ST976        | <i>wzi</i>  | <i>wzi-4</i>     | 83.5             | 83.5             | 83.5             | 83.5                   |
| 17PV        | ST307        | <i>pgi</i>  | <i>pgi-1</i>     | 86               | 85.5             | 85.5             | 85.7                   |
| 17PV        | ST307        | <i>wzi</i>  | <i>wzi-3</i>     | 84.5             | 84               | 84               | 84.2                   |
| 17PV        | ST307        | <i>wzi</i>  | <i>wzi-4</i>     | 82.5             | 82.5             | 82.5             | 82.5                   |
| 17PV        | ST307        | <i>infB</i> | <i>infB-1</i>    | 84               | 83.5             | 83.5             | 83.7                   |
| 17PV        | ST307        | <i>mdh</i>  | <i>mdh-1</i>     | 80               | 80               | 80               | 80                     |
| 17PV        | ST307        | <i>phoE</i> | <i>phoE-1</i>    | 81               | 81               | 80.5             | 80.8                   |
| 17PV        | ST307        | <i>rpoB</i> | <i>rpoB-1</i>    | 83.5             | 83.5             | 83.5             | 83.5                   |
| 17PV        | ST307        | <i>tonB</i> | <i>tonB-1</i>    | 86.5             | 86               | 86               | 86.2                   |
| 17PV        | ST307        | <i>tonB</i> | <i>tonB-2</i>    | 89.5             | 89.5             | 89.5             | 89.5                   |
| 17PV        | ST307        | <i>gapA</i> | <i>gapA-1</i>    | 85.5             | 85               | 85               | 85.2                   |
| 21PV        | ST307        | <i>infB</i> | <i>infB-1</i>    | 84.5             | 84.5             | 84               | 84.3                   |
| 21PV        | ST307        | <i>mdh</i>  | <i>mdh-1</i>     | 80.5             | 80.5             | 80.5             | 80.5                   |
| 21PV        | ST307        | <i>phoE</i> | <i>phoE-1</i>    | 81               | 81               | 81               | 81                     |
| 21PV        | ST307        | <i>rpoB</i> | <i>rpoB-1</i>    | 83.5             | 83.5             | 83.5             | 83.5                   |
| 21PV        | ST307        | <i>tonB</i> | <i>tonB-1</i>    | 86.5             | 86.5             | 86.5             | 86.5                   |
| 21PV        | ST307        | <i>tonB</i> | <i>tonB-2</i>    | 89               | 89               | 89               | 89                     |
| 21PV        | ST307        | <i>gapA</i> | <i>gapA-1</i>    | 85               | 85               | 85               | 85                     |
| 21PV        | ST307        | <i>pgi</i>  | <i>pgi-1</i>     | 86               | 86               | 86               | 86                     |
| 21PV        | ST307        | <i>wzi</i>  | <i>wzi-3</i>     | 85               | 85               | 85               | 85                     |
| 21PV        | ST307        | <i>wzi</i>  | <i>wzi-4</i>     | 83.5             | 83.5             | 83.5             | 83.5                   |
| 49BG        | ST147        | <i>infB</i> | <i>infB-1</i>    | 83.5             | 83.5             | 83.5             | 83.5                   |
| 49BG        | ST147        | <i>mdh</i>  | <i>mdh-1</i>     | 79.5             | 80               | 79.5             | 79.7                   |

| Strain name | MLST profile | Gene name   | Primer pair name | Melting T 1 (°C) | Melting T 2 (°C) | Melting T 3 (°C) | Average melting T (°C) |
|-------------|--------------|-------------|------------------|------------------|------------------|------------------|------------------------|
| 49BG        | ST147        | <i>phoE</i> | <i>phoE-1</i>    | 80.5             | 80.5             | 80.5             | 80.5                   |
| 49BG        | ST147        | <i>rpoB</i> | <i>rpoB-1</i>    | 83.5             | 83.5             | 84               | 83.7                   |
| 49BG        | ST147        | <i>tonB</i> | <i>tonB-1</i>    | 89               | 89               | 89               | 89                     |
| 49BG        | ST147        | <i>tonB</i> | <i>tonB-2</i>    | 86.5             | 86.5             | 86.5             | 86.5                   |
| 49BG        | ST147        | <i>gapA</i> | <i>gapA-1</i>    | 85.5             | 85               | 85               | 85.2                   |
| 49BG        | ST147        | <i>pgi</i>  | <i>pgi-1</i>     | 86               | 86               | 86               | 86                     |
| 49BG        | ST147        | <i>wzi</i>  | <i>wzi-3</i>     | 85               | 85               | 85               | 85                     |
| 49BG        | ST147        | <i>wzi</i>  | <i>wzi-4</i>     | 84.5             | 84.5             | 84.5             | 84.5                   |
| 51BG        | ST1626       | <i>infB</i> | <i>infB-1</i>    | 83.5             | 83.5             | 83               | 83.3                   |
| 51BG        | ST1626       | <i>mdh</i>  | <i>mdh-1</i>     | 80               | 80               | 80               | 80                     |
| 51BG        | ST1626       | <i>phoE</i> | <i>phoE-1</i>    | 80.5             | 80.5             | 80.5             | 80.5                   |
| 51BG        | ST1626       | <i>rpoB</i> | <i>rpoB-1</i>    | 83.5             | 83.5             | 83.5             | 83.5                   |
| 51BG        | ST1626       | <i>tonB</i> | <i>tonB-1</i>    | 86               | 86               | 86               | 86                     |
| 51BG        | ST1626       | <i>tonB</i> | <i>tonB-2</i>    | 89               | 89               | 89               | 89                     |
| 51BG        | ST1626       | <i>gapA</i> | <i>gapA-1</i>    | 85               | 85               | 85               | 85                     |
| 51BG        | ST1626       | <i>pgi</i>  | <i>pgi-1</i>     | 86               | 86               | 86               | 86                     |
| 51BG        | ST1626       | <i>wzi</i>  | <i>wzi-3</i>     | 85               | 85               | 85               | 85                     |
| 51BG        | ST1626       | <i>wzi</i>  | <i>wzi-4</i>     | 84               | 84               | 84               | 84                     |
| 52BG        | ST10         | <i>infB</i> | <i>infB-1</i>    | 83.5             | 83.5             | 83.5             | 83.5                   |
| 52BG        | ST10         | <i>mdh</i>  | <i>mdh-1</i>     | 78.5             | 79               | 79               | 78.8                   |
| 52BG        | ST10         | <i>phoE</i> | <i>phoE-1</i>    | 80               | 80.5             | 80               | 80.2                   |
| 52BG        | ST10         | <i>rpoB</i> | <i>rpoB-1</i>    | 83               | 83               | 83.5             | 83.2                   |
| 52BG        | ST10         | <i>tonB</i> | <i>tonB-1</i>    | 86               | 86               | 86               | 86                     |
| 52BG        | ST10         | <i>tonB</i> | <i>tonB-2</i>    | 88.5             | 89               | 89               | 88.8                   |
| 52BG        | ST10         | <i>gapA</i> | <i>gapA-1</i>    | 84.5             | 85               | 84.5             | 84.7                   |
| 52BG        | ST10         | <i>pgi</i>  | <i>pgi-1</i>     | 86               | 86               | 86               | 86                     |
| 52BG        | ST10         | <i>wzi</i>  | <i>wzi-3</i>     | 85               | 85               | 85               | 85                     |
| 52BG        | ST10         | <i>wzi</i>  | <i>wzi-4</i>     | 84.5             | 84.5             | 84.5             | 84.5                   |
| 53BG        | ST321        | <i>infB</i> | <i>infB-1</i>    | 84               | 84.5             | 84               | 84.2                   |
| 53BG        | ST321        | <i>mdh</i>  | <i>mdh-1</i>     | 80               | 80               | 80               | 80                     |
| 53BG        | ST321        | <i>phoE</i> | <i>phoE-1</i>    | 81               | 81               | 81               | 81                     |
| 53BG        | ST321        | <i>rpoB</i> | <i>rpoB-1</i>    | 83               | 83               | 83               | 83                     |
| 53BG        | ST321        | <i>tonB</i> | <i>tonB-1</i>    | 86.5             | 86.5             | 86.5             | 86.5                   |
| 53BG        | ST321        | <i>tonB</i> | <i>tonB-2</i>    | 89               | 89               | 89               | 89                     |
| 53BG        | ST321        | <i>gapA</i> | <i>gapA-1</i>    | 85               | 85               | 85               | 85                     |

| Strain name  | MLST profile | Gene name   | Primer pair name | Melting T 1 (°C) | Melting T 2 (°C) | Melting T 3 (°C) | Average melting T (°C) |
|--------------|--------------|-------------|------------------|------------------|------------------|------------------|------------------------|
| 53BG         | ST321        | <i>pgi</i>  | <i>pgi-1</i>     | 86               | 86               | 86               | 86                     |
| 53BG         | ST321        | <i>wzi</i>  | <i>wzi-3</i>     | 85               | 85               | 85               | 85                     |
| 53BG         | ST321        | <i>wzi</i>  | <i>wzi-4</i>     | 84               | 84               | 84               | 84                     |
| 55BG         | ST466        | <i>infB</i> | <i>infB-1</i>    | 83.5             | 83.5             | 83               | 83.3                   |
| 55BG         | ST466        | <i>mdh</i>  | <i>mdh-1</i>     | 80.5             | 80.5             | 80.5             | 80.5                   |
| 55BG         | ST466        | <i>phoE</i> | <i>phoE-1</i>    | 80.5             | 80.5             | 80.5             | 80.5                   |
| 55BG         | ST466        | <i>rpoB</i> | <i>rpoB-1</i>    | 83.5             | 83.5             | 83.5             | 83.5                   |
| 55BG         | ST466        | <i>tonB</i> | <i>tonB-1</i>    | 86.5             | 86.5             | 86.5             | 86.5                   |
| 55BG         | ST466        | <i>tonB</i> | <i>tonB-2</i>    | 89               | 89               | 89               | 89                     |
| 55BG         | ST466        | <i>gapA</i> | <i>gapA-1</i>    | 85               | 85               | 85               | 85                     |
| 55BG         | ST466        | <i>pgi</i>  | <i>pgi-1</i>     | 86               | 86               | 86               | 86                     |
| 55BG         | ST466        | <i>wzi</i>  | <i>wzi-3</i>     | 83.5             | 83.5             | 83.5             | 83.5                   |
| 55BG         | ST466        | <i>wzi</i>  | <i>wzi-4</i>     | 84.5             | 84.5             | 84.5             | 84.5                   |
| 63BG         | ST1627       | <i>infB</i> | <i>infB-1</i>    | 83.5             | 83.5             | 83               | 83.3                   |
| 63BG         | ST1627       | <i>mdh</i>  | <i>mdh-1</i>     | 80.5             | 80.5             | 80.5             | 80.5                   |
| 63BG         | ST1627       | <i>phoE</i> | <i>phoE-1</i>    | 80.5             | 80.5             | 80.5             | 80.5                   |
| 63BG         | ST1627       | <i>rpoB</i> | <i>rpoB-1</i>    | 83.5             | 83.5             | 83.5             | 83.5                   |
| 63BG         | ST1627       | <i>tonB</i> | <i>tonB-1</i>    | 86.5             | 86.5             | 86.5             | 86.5                   |
| 63BG         | ST1627       | <i>tonB</i> | <i>tonB-2</i>    | 88.5             | 89.5             | 89.5             | 89.2                   |
| 63BG         | ST1627       | <i>gapA</i> | <i>gapA-1</i>    | 85               | 85               | 85               | 85                     |
| 63BG         | ST1627       | <i>pgi</i>  | <i>pgi-1</i>     | 86               | 86               | 86.5             | 86.2                   |
| 63BG         | ST1627       | <i>wzi</i>  | <i>wzi-3</i>     | 84               | 84               | 84               | 84                     |
| 63BG         | ST1627       | <i>wzi</i>  | <i>wzi-4</i>     | 84.5             | 84.5             | 84.5             | 84.5                   |
| BG-Kpn-20-18 | ST512        | <i>wzi</i>  | <i>wzi-3</i>     | 84               | 84               | 84               | 84                     |
| BG-Kpn-20-18 | ST512        | <i>wzi</i>  | <i>wzi-4</i>     | 83.5             | 83.5             | 83.5             | 83.5                   |
| BG-Kpn-20-18 | ST512        | <i>pgi</i>  | <i>pgi-1</i>     | 86               | 86               | 86               | 86                     |
| BG-Kpn-20-18 | ST512        | <i>infB</i> | <i>infB-1</i>    | 83.5             | 83.5             | 83.5             | 83.5                   |
| BG-Kpn-20-18 | ST512        | <i>mdh</i>  | <i>mdh-1</i>     | 80.5             | 80.5             | 80.5             | 80.5                   |
| BG-Kpn-20-18 | ST512        | <i>phoE</i> | <i>phoE-1</i>    | 80.5             | 80.5             | 80.5             | 80.5                   |
| BG-Kpn-20-18 | ST512        | <i>rpoB</i> | <i>rpoB-1</i>    | 83.5             | 83.5             | 83               | 83.3                   |
| BG-Kpn-20-18 | ST512        | <i>tonB</i> | <i>tonB-1</i>    | 86.5             | 86.5             | 86.5             | 86.5                   |
| BG-Kpn-20-18 | ST512        | <i>tonB</i> | <i>tonB-2</i>    | 88.5             | 88.5             | 88.5             | 88.5                   |
| BG-Kpn-20-18 | ST512        | <i>gapA</i> | <i>gapA-1</i>    | 85               | 84.5             | 84.5             | 84.7                   |
| BG-Kpn-21-18 | ST512        | <i>pgi</i>  | <i>pgi-1</i>     | 86.5             | 86               | 86               | 86.2                   |
| BG-Kpn-21-18 | ST512        | <i>wzi</i>  | <i>wzi-3</i>     | 84               | 84               | 84               | 84                     |

| Strain name  | MLST profile | Gene name   | Primer pair name | Melting T 1 (°C) | Melting T 2 (°C) | Melting T 3 (°C) | Average melting T (°C) |
|--------------|--------------|-------------|------------------|------------------|------------------|------------------|------------------------|
| BG-Kpn-21-18 | ST512        | <i>wzi</i>  | <i>wzi-4</i>     | 83.5             | 83.5             | 83.5             | 83.5                   |
| BG-Kpn-21-18 | ST512        | <i>infB</i> | <i>infB-1</i>    | 83.5             | 83.5             | 83.5             | 83.5                   |
| BG-Kpn-21-18 | ST512        | <i>mdh</i>  | <i>mdh-1</i>     | 80.5             | 80.5             | 80.5             | 80.5                   |
| BG-Kpn-21-18 | ST512        | <i>phoE</i> | <i>phoE-1</i>    | 80.5             | 80.5             | 80.5             | 80.5                   |
| BG-Kpn-21-18 | ST512        | <i>rpoB</i> | <i>rpoB-1</i>    | 83.5             | 83.5             | 83.5             | 83.5                   |
| BG-Kpn-21-18 | ST512        | <i>tonB</i> | <i>tonB-1</i>    | 86.5             | 86.5             | 86.5             | 86.5                   |
| BG-Kpn-21-18 | ST512        | <i>tonB</i> | <i>tonB-2</i>    | 88.5             | 88.5             | 88.5             | 88.5                   |
| BG-Kpn-21-18 | ST512        | <i>gapA</i> | <i>gapA-1</i>    | 85               | 85               | 85               | 85                     |
| BG-Kpn-22-18 | ST307        | <i>pgi</i>  | <i>pgi-1</i>     | 86               | 86               | 86               | 86                     |
| BG-Kpn-22-18 | ST307        | <i>wzi</i>  | <i>wzi-3</i>     | 84.5             | 84.5             | 84.5             | 84.5                   |
| BG-Kpn-22-18 | ST307        | <i>wzi</i>  | <i>wzi-4</i>     | 82.5             | 82.5             | 82.5             | 82.5                   |
| BG-Kpn-22-18 | ST307        | <i>infB</i> | <i>infB-1</i>    | 84               | 84               | 84               | 84                     |
| BG-Kpn-22-18 | ST307        | <i>mdh</i>  | <i>mdh-1</i>     | 79.5             | 79.5             | 79.5             | 79.5                   |
| BG-Kpn-22-18 | ST307        | <i>phoE</i> | <i>phoE-1</i>    | 80.5             | 80.5             | 80.5             | 80.5                   |
| BG-Kpn-22-18 | ST307        | <i>rpoB</i> | <i>rpoB-1</i>    | 83.5             | 83.5             | 83               | 83.3                   |
| BG-Kpn-22-18 | ST307        | <i>tonB</i> | <i>tonB-1</i>    | 86.5             | 86.5             | 86.5             | 86.5                   |
| BG-Kpn-22-18 | ST307        | <i>tonB</i> | <i>tonB-2</i>    | 89               | 89               | 89               | 89                     |
| BG-Kpn-22-18 | ST307        | <i>gapA</i> | <i>gapA-1</i>    | 85               | 85               | 85               | 85                     |
| BG-Kpn-23-18 | ST512        | <i>pgi</i>  | <i>pgi-1</i>     | 86               | 86               | 86.5             | 86.2                   |
| BG-Kpn-23-18 | ST512        | <i>wzi</i>  | <i>wzi-3</i>     | 84               | 84               | 84               | 84                     |
| BG-Kpn-23-18 | ST512        | <i>wzi</i>  | <i>wzi-4</i>     | 83.5             | 83.5             | 83.5             | 83.5                   |
| BG-Kpn-23-18 | ST512        | <i>infB</i> | <i>infB-1</i>    | 83               | 83               | 83               | 83                     |
| BG-Kpn-23-18 | ST512        | <i>mdh</i>  | <i>mdh-1</i>     | 80.5             | 80.5             | 80.5             | 80.5                   |
| BG-Kpn-23-18 | ST512        | <i>phoE</i> | <i>phoE-1</i>    | 80.5             | 80.5             | 80.5             | 80.5                   |
| BG-Kpn-23-18 | ST512        | <i>rpoB</i> | <i>rpoB-1</i>    | 83.5             | 83.5             | 83.5             | 83.5                   |
| BG-Kpn-23-18 | ST512        | <i>tonB</i> | <i>tonB-1</i>    | 86.5             | 86.5             | 86.5             | 86.5                   |
| BG-Kpn-23-18 | ST512        | <i>tonB</i> | <i>tonB-2</i>    | 88.5             | 88.5             | 88.5             | 88.5                   |
| BG-Kpn-23-18 | ST512        | <i>gapA</i> | <i>gapA-1</i>    | 84.5             | 84.5             | 84.5             | 84.5                   |
| BG-Kpn-24-18 | ST512        | <i>pgi</i>  | <i>pgi-1</i>     | 86.5             | 86               | 86               | 86.2                   |
| BG-Kpn-24-18 | ST512        | <i>wzi</i>  | <i>wzi-3</i>     | 84               | 84               | 84               | 84                     |
| BG-Kpn-24-18 | ST512        | <i>wzi</i>  | <i>wzi-4</i>     | 83.5             | 83.5             | 83.5             | 83.5                   |
| BG-Kpn-24-18 | ST512        | <i>infB</i> | <i>infB-1</i>    | 83.5             | 83.5             | 83.5             | 83.5                   |
| BG-Kpn-24-18 | ST512        | <i>mdh</i>  | <i>mdh-1</i>     | 80.5             | 80.5             | 80.5             | 80.5                   |
| BG-Kpn-24-18 | ST512        | <i>phoE</i> | <i>phoE-1</i>    | 81               | 81               | 81               | 81                     |
| BG-Kpn-24-18 | ST512        | <i>rpoB</i> | <i>rpoB-1</i>    | 83.5             | 83.5             | 83.5             | 83.5                   |

| Strain name  | MLST profile | Gene name   | Primer pair name | Melting T 1 (°C) | Melting T 2 (°C) | Melting T 3 (°C) | Average melting T (°C) |
|--------------|--------------|-------------|------------------|------------------|------------------|------------------|------------------------|
| BG-Kpn-24-18 | ST512        | <i>tonB</i> | <i>tonB-1</i>    | 86.5             | 86.5             | 86.5             | 86.5                   |
| BG-Kpn-24-18 | ST512        | <i>tonB</i> | <i>tonB-2</i>    | 89               | 89               | 89               | 89                     |
| BG-Kpn-24-18 | ST512        | <i>gapA</i> | <i>gapA-1</i>    | 84.5             | 84.5             | 84.5             | 84.5                   |
| BG-Kpn-25-18 | ST512        | <i>pgi</i>  | <i>pgi-1</i>     | 86               | 86               | 86               | 86                     |
| BG-Kpn-25-18 | ST512        | <i>wzi</i>  | <i>wzi-3</i>     | 84               | 84               | 84               | 84                     |
| BG-Kpn-25-18 | ST512        | <i>wzi</i>  | <i>wzi-4</i>     | 83.5             | 83.5             | 83.5             | 83.5                   |
| BG-Kpn-25-18 | ST512        | <i>infB</i> | <i>infB-1</i>    | 83.5             | 83.5             | 83.5             | 83.5                   |
| BG-Kpn-25-18 | ST512        | <i>mdh</i>  | <i>mdh-1</i>     | 80.5             | 80.5             | 80.5             | 80.5                   |
| BG-Kpn-25-18 | ST512        | <i>phoE</i> | <i>phoE-1</i>    | 81               | 81               | 81               | 81                     |
| BG-Kpn-25-18 | ST512        | <i>rpoB</i> | <i>rpoB-1</i>    | 83.5             | 83.5             | 83.5             | 83.5                   |
| BG-Kpn-25-18 | ST512        | <i>tonB</i> | <i>tonB-1</i>    | 86.5             | 86.5             | 86.5             | 86.5                   |
| BG-Kpn-25-18 | ST512        | <i>tonB</i> | <i>tonB-2</i>    | 88.5             | 88.5             | 88.5             | 88.5                   |
| BG-Kpn-25-18 | ST512        | <i>gapA</i> | <i>gapA-1</i>    | 84.5             | 84.5             | 84.5             | 84.5                   |
| BG-Kpn-26-18 | ST512        | <i>pgi</i>  | <i>pgi-1</i>     | 86               | 86               | 86               | 86                     |
| BG-Kpn-26-18 | ST512        | <i>wzi</i>  | <i>wzi-3</i>     | 84               | 84               | 84               | 84                     |
| BG-Kpn-26-18 | ST512        | <i>wzi</i>  | <i>wzi-4</i>     | 83.5             | 83.5             | 83.5             | 83.5                   |
| BG-Kpn-26-18 | ST512        | <i>infB</i> | <i>infB-1</i>    | 83.5             | 83.5             | 83.5             | 83.5                   |
| BG-Kpn-26-18 | ST512        | <i>mdh</i>  | <i>mdh-1</i>     | 80.5             | 80.5             | 80.5             | 80.5                   |
| BG-Kpn-26-18 | ST512        | <i>phoE</i> | <i>phoE-1</i>    | 81               | 81               | 80.5             | 80.8                   |
| BG-Kpn-26-18 | ST512        | <i>rpoB</i> | <i>rpoB-1</i>    | 83.5             | 83.5             | 83.5             | 83.5                   |
| BG-Kpn-26-18 | ST512        | <i>tonB</i> | <i>tonB-1</i>    | 86.5             | 86.5             | 86.5             | 86.5                   |
| BG-Kpn-26-18 | ST512        | <i>tonB</i> | <i>tonB-2</i>    | 88.5             | 88.5             | 88.5             | 88.5                   |
| BG-Kpn-26-18 | ST512        | <i>gapA</i> | <i>gapA-1</i>    | 84.5             | 84.5             | 84.5             | 84.5                   |
| BG-Kpn-27-18 | ST512        | <i>pgi</i>  | <i>pgi-1</i>     | 86               | 86               | 86               | 86                     |
| BG-Kpn-27-18 | ST512        | <i>wzi</i>  | <i>wzi-3</i>     | 84               | 84               | 84               | 84                     |
| BG-Kpn-27-18 | ST512        | <i>wzi</i>  | <i>wzi-4</i>     | 83.5             | 83.5             | 83.5             | 83.5                   |
| BG-Kpn-27-18 | ST512        | <i>infB</i> | <i>infB-1</i>    | 83.5             | 83.5             | 83.5             | 83.5                   |
| BG-Kpn-27-18 | ST512        | <i>mdh</i>  | <i>mdh-1</i>     | 80.5             | 80.5             | 80.5             | 80.5                   |
| BG-Kpn-27-18 | ST512        | <i>phoE</i> | <i>phoE-1</i>    | 81               | 81               | 81               | 81                     |
| BG-Kpn-27-18 | ST512        | <i>rpoB</i> | <i>rpoB-1</i>    | 83.5             | 83.5             | 83.5             | 83.5                   |
| BG-Kpn-27-18 | ST512        | <i>tonB</i> | <i>tonB-1</i>    | 86.5             | 86.5             | 86.5             | 86.5                   |
| BG-Kpn-27-18 | ST512        | <i>tonB</i> | <i>tonB-2</i>    | 88.5             | 88.5             | 89               | 88.7                   |
| BG-Kpn-27-18 | ST512        | <i>gapA</i> | <i>gapA-1</i>    | 84.5             | 84.5             | 84.5             | 84.5                   |
| BG-Kpn-28-18 | ST512        | <i>pgi</i>  | <i>pgi-1</i>     | 86               | 86               | 86               | 86                     |
| BG-Kpn-28-18 | ST512        | <i>wzi</i>  | <i>wzi-3</i>     | 84               | 84               | 84               | 84                     |



| Strain name  | MLST profile | Gene name   | Primer pair name | Melting T 1 (°C) | Melting T 2 (°C) | Melting T 3 (°C) | Average melting T (°C) |
|--------------|--------------|-------------|------------------|------------------|------------------|------------------|------------------------|
| BG-Kpn-28-18 | ST512        | <i>wzi</i>  | <i>wzi-4</i>     | 83.5             | 83.5             | 83.5             | 83.5                   |
| BG-Kpn-28-18 | ST512        | <i>infB</i> | <i>infB-1</i>    | 83.5             | 83               | 83.5             | 83.3                   |
| BG-Kpn-28-18 | ST512        | <i>mdh</i>  | <i>mdh-1</i>     | 80.5             | 80.5             | 80.5             | 80.5                   |
| BG-Kpn-28-18 | ST512        | <i>phoE</i> | <i>phoE-1</i>    | 81               | 81               | 81               | 81                     |
| BG-Kpn-28-18 | ST512        | <i>rpoB</i> | <i>rpoB-1</i>    | 83.5             | 83.5             | 83.5             | 83.5                   |
| BG-Kpn-28-18 | ST512        | <i>tonB</i> | <i>tonB-1</i>    | 86.5             | 86.5             | 86.5             | 86.5                   |
| BG-Kpn-28-18 | ST512        | <i>tonB</i> | <i>tonB-2</i>    | 89               | 89               | 89               | 89                     |
| BG-Kpn-28-18 | ST512        | <i>gapA</i> | <i>gapA-1</i>    | 84.5             | 84.5             | 84.5             | 84.5                   |
| BG-Kpn-29-18 | ST512        | <i>pgi</i>  | <i>pgi-1</i>     | 86               | 86               | 86               | 86                     |
| BG-Kpn-29-18 | ST512        | <i>wzi</i>  | <i>wzi-3</i>     | 84               | 84               | 84               | 84                     |
| BG-Kpn-29-18 | ST512        | <i>wzi</i>  | <i>wzi-4</i>     | 83.5             | 83.5             | 83.5             | 83.5                   |
| BG-Kpn-29-18 | ST512        | <i>infB</i> | <i>infB-1</i>    | 83.5             | 83.5             | 83.5             | 83.5                   |
| BG-Kpn-29-18 | ST512        | <i>mdh</i>  | <i>mdh-1</i>     | 80.5             | 80.5             | 80.5             | 80.5                   |
| BG-Kpn-29-18 | ST512        | <i>phoE</i> | <i>phoE-1</i>    | 81               | 81               | 81               | 81                     |
| BG-Kpn-29-18 | ST512        | <i>rpoB</i> | <i>rpoB-1</i>    | 83.5             | 83.5             | 83.5             | 83.5                   |
| BG-Kpn-29-18 | ST512        | <i>tonB</i> | <i>tonB-1</i>    | 86.5             | 86.5             | 86.5             | 86.5                   |
| BG-Kpn-29-18 | ST512        | <i>gapA</i> | <i>gapA-1</i>    | 84.5             | 84.5             | 84.5             | 84.5                   |
| BG-Kpn-29-18 | ST512        | <i>tonB</i> | <i>tonB-2</i>    | 89               | 89               | 89               | 89                     |
| BG-Kpn-30-18 | ST512        | <i>pgi</i>  | <i>pgi-1</i>     | 86               | 86               | 86               | 86                     |
| BG-Kpn-30-18 | ST512        | <i>wzi</i>  | <i>wzi-3</i>     | 84               | 84               | 84               | 84                     |
| BG-Kpn-30-18 | ST512        | <i>wzi</i>  | <i>wzi-4</i>     | 83.5             | 83.5             | 83.5             | 83.5                   |
| BG-Kpn-30-18 | ST512        | <i>infB</i> | <i>infB-1</i>    | 83.5             | 83.5             | 83.5             | 83.5                   |
| BG-Kpn-30-18 | ST512        | <i>mdh</i>  | <i>mdh-1</i>     | 80.5             | 80.5             | 80.5             | 80.5                   |
| BG-Kpn-30-18 | ST512        | <i>phoE</i> | <i>phoE-1</i>    | 81               | 81               | 81               | 81                     |
| BG-Kpn-30-18 | ST512        | <i>rpoB</i> | <i>rpoB-1</i>    | 83.5             | 83.5             | 83.5             | 83.5                   |
| BG-Kpn-30-18 | ST512        | <i>tonB</i> | <i>tonB-1</i>    | 86.5             | 86.5             | 86.5             | 86.5                   |
| BG-Kpn-30-18 | ST512        | <i>tonB</i> | <i>tonB-2</i>    | 89               | 89               | 89               | 89                     |
| BG-Kpn-30-18 | ST512        | <i>gapA</i> | <i>gapA-1</i>    | 84.5             | 84.5             | 84.5             | 84.5                   |
| KP123        | ST512        | <i>infB</i> | <i>infB-1</i>    | 83.5             | 83.5             | 83               | 83.3                   |
| KP123        | ST512        | <i>mdh</i>  | <i>mdh-1</i>     | 80.5             | 80.5             | 80.5             | 80.5                   |
| KP123        | ST512        | <i>phoE</i> | <i>phoE-1</i>    | 81               | 81               | 80.5             | 80.8                   |
| KP123        | ST512        | <i>rpoB</i> | <i>rpoB-1</i>    | 83.5             | 83.5             | 83.5             | 83.5                   |
| KP123        | ST512        | <i>tonB</i> | <i>tonB-1</i>    | 86.5             | 86.5             | 86.5             | 86.5                   |
| KP123        | ST512        | <i>tonB</i> | <i>tonB-2</i>    | 88.5             | 88.5             | 88.5             | 88.5                   |
| KP123        | ST512        | <i>gapA</i> | <i>gapA-1</i>    | 84.5             | 84.5             | 84.5             | 84.5                   |

| Strain name | MLST profile | Gene name   | Primer pair name | Melting T 1 (°C) | Melting T 2 (°C) | Melting T 3 (°C) | Average melting T (°C) |
|-------------|--------------|-------------|------------------|------------------|------------------|------------------|------------------------|
| KP123       | ST512        | <i>pgi</i>  | <i>pgi-1</i>     | 86               | 86               | 86               | 86                     |
| KP123       | ST512        | <i>wzi</i>  | <i>wzi-3</i>     | 84               | 84               | 84               | 84                     |
| KP123       | ST512        | <i>wzi</i>  | <i>wzi-4</i>     | 83.5             | 83.5             | 83.5             | 83.5                   |
| KP248       | ST423        | <i>infB</i> | <i>infB-1</i>    | 83.5             | 83.5             | 83.5             | 83.5                   |
| KP248       | ST423        | <i>mdh</i>  | <i>mdh-1</i>     | 80.5             | 80.5             | 80.5             | 80.5                   |
| KP248       | ST423        | <i>phoE</i> | <i>phoE-1</i>    | 81               | 81               | 80.5             | 80.8                   |
| KP248       | ST423        | <i>rpoB</i> | <i>rpoB-1</i>    | 83.5             | 83.5             | 83.5             | 83.5                   |
| KP248       | ST423        | <i>tonB</i> | <i>tonB-1</i>    | 86.5             | 86.5             | 86.5             | 86.5                   |
| KP248       | ST423        | <i>tonB</i> | <i>tonB-2</i>    | 89               | 89               | 89               | 89                     |
| KP248       | ST423        | <i>gapA</i> | <i>gapA-1</i>    | 84.5             | 84.5             | 84.5             | 84.5                   |
| KP248       | ST423        | <i>pgi</i>  | <i>pgi-1</i>     | 86               | 86               | 86               | 86                     |
| KP248       | ST423        | <i>wzi</i>  | <i>wzi-3</i>     | 84               | 84               | 83.5             | 83.8                   |
| KP248       | ST423        | <i>wzi</i>  | <i>wzi-4</i>     | 83.5             | 83.5             | 83.5             | 83.5                   |
| KP261       | ST258        | <i>infB</i> | <i>infB-1</i>    | 83.5             | 83.5             | 83.5             | 83.5                   |
| KP261       | ST258        | <i>mdh</i>  | <i>mdh-1</i>     | 80.5             | 80.5             | 80.5             | 80.5                   |
| KP261       | ST258        | <i>phoE</i> | <i>phoE-1</i>    | 80.5             | 80.5             | 80.5             | 80.5                   |
| KP261       | ST258        | <i>rpoB</i> | <i>rpoB-1</i>    | 83.5             | 83.5             | 83.5             | 83.5                   |
| KP261       | ST258        | <i>tonB</i> | <i>tonB-1</i>    | 86.5             | 86.5             | 86.5             | 86.5                   |
| KP261       | ST258        | <i>tonB</i> | <i>tonB-2</i>    | 88.5             | 88.5             | 88.5             | 88.5                   |
| KP261       | ST258        | <i>gapA</i> | <i>gapA-1</i>    | 85               | 85               | 85               | 85                     |
| KP261       | ST258        | <i>pgi</i>  | <i>pgi-1</i>     | 86               | 86               | 86               | 86                     |
| KP261       | ST258        | <i>wzi</i>  | <i>wzi-3</i>     | 83.5             | 83.5             | 83.5             | 83.5                   |
| KP261       | ST258        | <i>wzi</i>  | <i>wzi-4</i>     | 84.5             | 84.5             | 84.5             | 84.5                   |
| KP359       | ST149        | <i>infB</i> | <i>infB-1</i>    | 84               | 84               | 84               | 84                     |
| KP359       | ST149        | <i>mdh</i>  | <i>mdh-1</i>     | 80               | 80               | 80               | 80                     |
| KP359       | ST149        | <i>phoE</i> | <i>phoE-1</i>    | 81               | 81               | 80.5             | 80.8                   |
| KP359       | ST149        | <i>rpoB</i> | <i>rpoB-1</i>    | 84               | 84               | 84               | 84                     |
| KP359       | ST149        | <i>tonB</i> | <i>tonB-1</i>    | 86.5             | 86.5             | 86.5             | 86.5                   |
| KP359       | ST149        | <i>tonB</i> | <i>tonB-2</i>    | 89               | 89               | 89               | 89                     |
| KP359       | ST149        | <i>gapA</i> | <i>gapA-1</i>    | 85               | 85               | 85               | 85                     |
| KP359       | ST149        | <i>pgi</i>  | <i>pgi-1</i>     | 86               | 86               | 86               | 86                     |
| KP359       | ST149        | <i>wzi</i>  | <i>wzi-3</i>     | 84               | 84               | 84               | 84                     |
| KP359       | ST149        | <i>wzi</i>  | <i>wzi-4</i>     | 84               | 84               | 84               | 84                     |
| KP366       | ST11         | <i>infB</i> | <i>infB-1</i>    | 83.5             | 83.5             | 83               | 83.3                   |
| KP366       | ST11         | <i>mdh</i>  | <i>mdh-1</i>     | 80.5             | 80.5             | 80.5             | 80.5                   |

| Strain name | MLST profile | Gene name   | Primer pair name | Melting T 1 (°C) | Melting T 2 (°C) | Melting T 3 (°C) | Average melting T (°C) |
|-------------|--------------|-------------|------------------|------------------|------------------|------------------|------------------------|
| KP366       | ST11         | <i>phoE</i> | <i>phoE-1</i>    | 81               | 80.5             | 80.5             | 80.7                   |
| KP366       | ST11         | <i>rpoB</i> | <i>rpoB-1</i>    | 83.5             | 83.5             | 83.5             | 83.5                   |
| KP366       | ST11         | <i>tonB</i> | <i>tonB-1</i>    | 87               | 87               | 87               | 87                     |
| KP366       | ST11         | <i>tonB</i> | <i>tonB-2</i>    | 88.5             | 88.5             | 88.5             | 88.5                   |
| KP366       | ST11         | <i>pgi</i>  | <i>pgi-1</i>     | 86               | 86               | 86               | 86                     |
| KP366       | ST11         | <i>gapA</i> | <i>gapA-1</i>    | 85               | 85               | 85               | 85                     |
| KP366       | ST11         | <i>wzi</i>  | <i>wzi-3</i>     | 85               | 85               | 85               | 85                     |
| KP366       | ST11         | <i>wzi</i>  | <i>wzi-4</i>     | 84               | 84               | 84               | 84                     |
| KP469       | ST395        | <i>infB</i> | <i>infB-1</i>    | 84               | 84               | 84               | 84                     |
| KP469       | ST395        | <i>mdh</i>  | <i>mdh-1</i>     | 80               | 80               | 80               | 80                     |
| KP469       | ST395        | <i>phoE</i> | <i>phoE-1</i>    | 81               | 80.5             | 80.5             | 80.7                   |
| KP469       | ST395        | <i>rpoB</i> | <i>rpoB-1</i>    | 83.5             | 83.5             | 83.5             | 83.5                   |
| KP469       | ST395        | <i>tonB</i> | <i>tonB-1</i>    | 87               | 87               | 87               | 87                     |
| KP469       | ST395        | <i>tonB</i> | <i>tonB-2</i>    | 89               | 89               | 89               | 89                     |
| KP469       | ST395        | <i>gapA</i> | <i>gapA-1</i>    | 85               | 85               | 85               | 85                     |
| KP469       | ST395        | <i>pgi</i>  | <i>pgi-1</i>     | 85.5             | 85.5             | 85.5             | 85.5                   |
| KP469       | ST395        | <i>wzi</i>  | <i>wzi-3</i>     | 85               | 85               | 85               | 85                     |
| KP469       | ST395        | <i>wzi</i>  | <i>wzi-4</i>     | 83.5             | 83.5             | 83.5             | 83.5                   |
| KP473       | ST101        | <i>infB</i> | <i>infB-1</i>    | 84               | 84               | 84               | 84                     |
| KP473       | ST101        | <i>mdh</i>  | <i>mdh-1</i>     | 80.5             | 80.5             | 80.5             | 80.5                   |
| KP473       | ST101        | <i>phoE</i> | <i>phoE-1</i>    | 80.5             | 80.5             | 80.5             | 80.5                   |
| KP473       | ST101        | <i>rpoB</i> | <i>rpoB-1</i>    | 83.5             | 83.5             | 83.5             | 83.5                   |
| KP473       | ST101        | <i>tonB</i> | <i>tonB-1</i>    | 86.5             | 86.5             | 86.5             | 86.5                   |
| KP473       | ST101        | <i>tonB</i> | <i>tonB-2</i>    | 89               | 89               | 88.5             | 88.8                   |
| KP473       | ST101        | <i>pgi</i>  | <i>pgi-1</i>     | 86               | 86               | 86               | 86                     |
| KP473       | ST101        | <i>gapA</i> | <i>gapA-1</i>    | 85               | 85               | 85               | 85                     |
| KP473       | ST101        | <i>wzi</i>  | <i>wzi-3</i>     | 85               | 85               | 85               | 85                     |
| KP473       | ST101        | <i>wzi</i>  | <i>wzi-4</i>     | 84               | 84               | 83.5             | 83.8                   |
| KP485       | ST15         | <i>infB</i> | <i>infB-1</i>    | 84               | 84               | 84               | 84                     |
| KP485       | ST15         | <i>mdh</i>  | <i>mdh-1</i>     | 80.5             | 80.5             | 80.5             | 80.5                   |
| KP485       | ST15         | <i>phoE</i> | <i>phoE-1</i>    | 81               | 80.5             | 80.5             | 80.7                   |
| KP485       | ST15         | <i>rpoB</i> | <i>rpoB-1</i>    | 83.5             | 83.5             | 83.5             | 83.5                   |
| KP485       | ST15         | <i>tonB</i> | <i>tonB-1</i>    | 86.5             | 86.5             | 86.5             | 86.5                   |
| KP485       | ST15         | <i>tonB</i> | <i>tonB-2</i>    | 89               | 89               | 89               | 89                     |
| KP485       | ST15         | <i>gapA</i> | <i>gapA-1</i>    | 85               | 85               | 85               | 85                     |

| Strain name   | MLST profile | Gene name  | Primer pair name | Melting T 1 (°C) | Melting T 2 (°C) | Melting T 3 (°C) | Average melting T (°C) |
|---------------|--------------|------------|------------------|------------------|------------------|------------------|------------------------|
| KP485         | ST15         | <i>pgi</i> | <i>pgi-1</i>     | 86               | 86               | 86               | 86                     |
| KP485         | ST15         | <i>wzi</i> | <i>wzi-3</i>     | 82.5             | 82.5             | 82               | 82.3                   |
| KP485         | ST15         | <i>wzi</i> | <i>wzi-4</i>     | 84               | 84               | 84               | 84                     |
| 54BG          | ST258        | <i>wzi</i> | <i>wzi-3</i>     | 84               | 84               | 84               | 84                     |
| 54BG          | ST258        | <i>wzi</i> | <i>wzi-4</i>     | 85               | 84.5             | 84.5             | 84.7                   |
| 56BG          | ST258        | <i>wzi</i> | <i>wzi-4</i>     | 84.5             | 84.5             | 84.5             | 84.5                   |
| 56BG          | ST258        | <i>wzi</i> | <i>wzi-3</i>     | 84               | 84               | 84               | 84                     |
| 57BG          | ST258        | <i>wzi</i> | <i>wzi-3</i>     | 84               | 83.5             | 83.5             | 83.7                   |
| 57BG          | ST258        | <i>wzi</i> | <i>wzi-4</i>     | 84.5             | 84.5             | 84.5             | 84.5                   |
| BG-Kpn-101-19 | ST15         | <i>wzi</i> | <i>wzi-3</i>     | 85.5             | 85               | 85               | 85.2                   |
| BG-Kpn-101-19 | ST15         | <i>wzi</i> | <i>wzi-4</i>     | 84               | 84               | 83.5             | 83.8                   |
| BG-Kpn-103-19 | ST15         | <i>wzi</i> | <i>wzi-3</i>     | 85               | 85               | 85               | 85                     |
| BG-Kpn-103-19 | ST15         | <i>wzi</i> | <i>wzi-4</i>     | 84               | 84               | 83.5             | 83.8                   |
| KP1-19        | ST101        | <i>wzi</i> | <i>wzi-3</i>     | 85               | 85               | 85               | 85                     |
| KP1-19        | ST101        | <i>wzi</i> | <i>wzi-4</i>     | 83.5             | 83.5             | 83.5             | 83.5                   |
| KP108-18-2    | ST512        | <i>wzi</i> | <i>wzi-3</i>     | 83.5             | 83.5             | 83.5             | 83.5                   |
| KP108-18-2    | ST512        | <i>wzi</i> | <i>wzi-4</i>     | 83.5             | 83.5             | 83               | 83.3                   |
| KP11-19       | ST512        | <i>wzi</i> | <i>wzi-3</i>     | 83.5             | 83.5             | 83.5             | 83.5                   |
| KP11-19       | ST512        | <i>wzi</i> | <i>wzi-4</i>     | 83.5             | 83.5             | 83               | 83.3                   |
| KP12-19       | ST512        | <i>wzi</i> | <i>wzi-4</i>     | 83.5             | 83.5             | 83.5             | 83.5                   |
| KP12-19       | ST512        | <i>wzi</i> | <i>wzi-3</i>     | 83.5             | 83.5             | 83.5             | 83.5                   |
| KP12-19-2     | ST512        | <i>wzi</i> | <i>wzi-3</i>     | 83.5             | 83.5             | 83.5             | 83.5                   |
| KP12-19-2     | ST512        | <i>wzi</i> | <i>wzi-4</i>     | 83.5             | 83.5             | 83.5             | 83.5                   |
| KP13-19       | ST307        | <i>wzi</i> | <i>wzi-4</i>     | 82.5             | 82.5             | 82.5             | 82.5                   |
| KP13-19       | ST307        | <i>wzi</i> | <i>wzi-3</i>     | 84               | 84               | 84               | 84                     |
| KP14-19       | ST512        | <i>wzi</i> | <i>wzi-4</i>     | 83.5             | 83.5             | 83.5             | 83.5                   |
| KP14-19       | ST512        | <i>wzi</i> | <i>wzi-3</i>     | 83.5             | 83.5             | 83.5             | 83.5                   |
| KP15-19       | ST307        | <i>wzi</i> | <i>wzi-3</i>     | 84.5             | 84.5             | 84.5             | 84.5                   |
| KP35-19       | ST307        | <i>wzi</i> | <i>wzi-3</i>     | 84.5             | 84.5             | 84.5             | 84.5                   |
| KP17-19       | ST101        | <i>wzi</i> | <i>wzi-4</i>     | 83.5             | 83.5             | 83.5             | 83.5                   |
| KP17-19       | ST101        | <i>wzi</i> | <i>wzi-3</i>     | 85               | 85               | 84.5             | 84.8                   |
| KP18-19       | ST101        | <i>wzi</i> | <i>wzi-4</i>     | 83.5             | 83.5             | 83.5             | 83.5                   |
| KP18-19       | ST101        | <i>wzi</i> | <i>wzi-3</i>     | 85               | 85               | 84.5             | 84.8                   |
| KP19-19       | ST512        | <i>wzi</i> | <i>wzi-4</i>     | 83.5             | 83.5             | 83.5             | 83.5                   |
| KP19-19       | ST512        | <i>wzi</i> | <i>wzi-3</i>     | 83.5             | 83.5             | 83.5             | 83.5                   |

| Strain name | MLST profile | Gene name | Primer pair name | Melting T 1 (°C) | Melting T 2 (°C) | Melting T 3 (°C) | Average melting T (°C) |
|-------------|--------------|-----------|------------------|------------------|------------------|------------------|------------------------|
| KP2-19      | ST307        | wzi       | wzi-4            | 82.5             | 82.5             | 82.5             | 82.5                   |
| KP2-19      | ST307        | wzi       | wzi-3            | 84               | 84               | 84               | 84                     |
| KP20-19     | ST258        | wzi       | wzi-3            | 83.5             | 83.5             | 83.5             | 83.5                   |
| KP20-19     | ST258        | wzi       | wzi-4            | 84.5             | 84.5             | 84               | 84.3                   |
| KP21-19     | ST258        | wzi       | wzi-3            | 83.5             | 83.5             | 83.5             | 83.5                   |
| KP21-19     | ST258        | wzi       | wzi-4            | 84.5             | 84.5             | 84.5             | 84.5                   |
| KP232       | ST258        | wzi       | wzi-3            | 84               | 84               | 83.5             | 83.8                   |
| KP232       | ST258        | wzi       | wzi-4            | 83.5             | 83.5             | 83.5             | 83.5                   |
| KP24-19     | ST512        | wzi       | wzi-3            | 83.5             | 83.5             | 83.5             | 83.5                   |
| KP24-19     | ST512        | wzi       | wzi-4            | 83.5             | 83.5             | 83.5             | 83.5                   |
| KP246       | ST258        | wzi       | wzi-4            | 84.5             | 84.5             | 84.5             | 84.5                   |
| KP246       | ST258        | wzi       | wzi-3            | 84               | 84               | 84               | 84                     |
| KP25-19     | ST307        | wzi       | wzi-3            | 84.5             | 84.5             | 84               | 84.3                   |
| KP25-19     | ST307        | wzi       | wzi-4            | 82.5             | 82.5             | 82.5             | 82.5                   |
| KP252       | ST258        | wzi       | wzi-3            | 84               | 84               | 83.5             | 83.8                   |
| KP252       | ST258        | wzi       | wzi-4            | 83.5             | 83.5             | 83.5             | 83.5                   |
| KP26-19     | ST307        | wzi       | wzi-4            | 83               | 82.5             | 82.5             | 82.7                   |
| KP26-19     | ST307        | wzi       | wzi-3            | 84.5             | 84.5             | 84.5             | 84.5                   |
| KP27-19     | ST307        | wzi       | wzi-4            | 83               | 82.5             | 82.5             | 82.7                   |
| KP27-19     | ST307        | wzi       | wzi-3            | 84.5             | 84.5             | 84.5             | 84.5                   |
| KP29-19     | ST512        | wzi       | wzi-4            | 83.5             | 83.5             | 83               | 83.3                   |
| KP29-19     | ST512        | wzi       | wzi-3            | 83.5             | 83.5             | 83.5             | 83.5                   |
| KP3-19      | ST307        | wzi       | wzi-4            | 82.5             | 82.5             | 82.5             | 82.5                   |
| KP3-19      | ST307        | wzi       | wzi-3            | 84.5             | 84               | 84               | 84.2                   |
| KP34-19     | ST101        | wzi       | wzi-4            | 83.5             | 83.5             | 83.5             | 83.5                   |
| KP34-19     | ST101        | wzi       | wzi-3            | 85               | 85               | 85               | 85                     |
| KP37-19     | ST307        | wzi       | wzi-3            | 84.5             | 84.5             | 84.5             | 84.5                   |
| KP4-19      | ST101        | wzi       | wzi-3            | 85               | 85               | 85               | 85                     |
| KP36-19     | ST101        | wzi       | wzi-4            | 83.5             | 83.5             | 83.5             | 83.5                   |
| KP36-19     | ST101        | wzi       | wzi-3            | 85               | 85               | 85               | 85                     |
| KP65-18-3   | ST101        | wzi       | wzi-3            | 85               | 85               | 84.5             | 84.8                   |
| KP8-19      | ST101        | wzi       | wzi-3            | 85               | 85               | 84.5             | 84.8                   |
| KP38-19     | ST101        | wzi       | wzi-4            | 83.5             | 83.5             | 83.5             | 83.5                   |
| KP38-19     | ST101        | wzi       | wzi-3            | 85               | 85               | 84.5             | 84.8                   |
| KP15-19     | ST307        | wzi       | wzi-4            | 83               | 83               | 82.5             | 82.8                   |

| Strain name | MLST profile | Gene name | Primer pair name | Melting T 1 (°C) | Melting T 2 (°C) | Melting T 3 (°C) | Average melting T (°C) |
|-------------|--------------|-----------|------------------|------------------|------------------|------------------|------------------------|
| KP35-19     | ST307        | wzi       | wzi-4            | 83               | 83               | 82.5             | 82.8                   |
| KP40-19     | ST307        | wzi       | wzi-3            | 84.5             | 84.5             | 84.5             | 84.5                   |
| KP40-19     | ST307        | wzi       | wzi-4            | 82.5             | 82.5             | 82.5             | 82.5                   |
| KP41-19     | ST307        | wzi       | wzi-4            | 83               | 82.5             | 82.5             | 82.7                   |
| KP41-19     | ST307        | wzi       | wzi-3            | 84.5             | 84.5             | 84               | 84.3                   |
| KP43-19     | ST101        | wzi       | wzi-3            | 85               | 85               | 85               | 85                     |
| KP43-19     | ST101        | wzi       | wzi-4            | 83.5             | 83.5             | 83.5             | 83.5                   |
| KP44-19     | ST307        | wzi       | wzi-4            | 82.5             | 82.5             | 82.5             | 82.5                   |
| KP44-19     | ST307        | wzi       | wzi-3            | 84.5             | 84.5             | 84               | 84.3                   |
| KP46-19     | ST307        | wzi       | wzi-3            | 84.5             | 84.5             | 84               | 84.3                   |
| KP46-19     | ST307        | wzi       | wzi-4            | 82.5             | 82.5             | 82.5             | 82.5                   |
| KP488       | ST258        | wzi       | wzi-3            | 84               | 84               | 83.5             | 83.8                   |
| KP488       | ST258        | wzi       | wzi-4            | 83.5             | 83.5             | 83.5             | 83.5                   |
| KP49-19     | ST512        | wzi       | wzi-3            | 83.5             | 83.5             | 83.5             | 83.5                   |
| KP49-19     | ST512        | wzi       | wzi-4            | 83.5             | 83.5             | 83.5             | 83.5                   |
| KP5-19      | ST307        | wzi       | wzi-3            | 84               | 84               | 84               | 84                     |
| KP5-19      | ST307        | wzi       | wzi-4            | 82.5             | 82.5             | 82.5             | 82.5                   |
| KP51-19     | ST11         | wzi       | wzi-4            | 83.5             | 83.5             | 83.5             | 83.5                   |
| KP51-19     | ST11         | wzi       | wzi-3            | 85               | 85               | 85               | 85                     |
| KP54-19     | ST258        | wzi       | wzi-4            | 84.5             | 84.5             | 84.5             | 84.5                   |
| KP54-19     | ST258        | wzi       | wzi-3            | 83.5             | 83.5             | 83.5             | 83.5                   |
| KP56-19     | ST512        | wzi       | wzi-3            | 83.5             | 83.5             | 83.5             | 83.5                   |
| KP56-19     | ST512        | wzi       | wzi-4            | 83.5             | 83.5             | 83.5             | 83.5                   |
| KP57-19     | ST512        | wzi       | wzi-3            | 83.5             | 83.5             | 83.5             | 83.5                   |
| KP57-19     | ST512        | wzi       | wzi-4            | 83.5             | 83.5             | 83.5             | 83.5                   |
| KP58-19     | ST101        | wzi       | wzi-3            | 85               | 85               | 85               | 85                     |
| KP58-19     | ST101        | wzi       | wzi-4            | 83.5             | 83.5             | 83.5             | 83.5                   |
| KP59-19     | ST512        | wzi       | wzi-4            | 83.5             | 83.5             | 83               | 83.3                   |
| KP59-19     | ST512        | wzi       | wzi-3            | 83.5             | 83.5             | 83.5             | 83.5                   |
| KP6-19      | ST307        | wzi       | wzi-3            | 84               | 84               | 84               | 84                     |
| KP6-19      | ST307        | wzi       | wzi-4            | 82.5             | 82.5             | 82.5             | 82.5                   |
| KP37-19     | ST307        | wzi       | wzi-4            | 83               | 83               | 82.5             | 82.8                   |
| KP4-19      | ST101        | wzi       | wzi-4            | 83.5             | 83.5             | 83               | 83.3                   |
| KP7-19      | ST307        | wzi       | wzi-4            | 82.5             | 82.5             | 82               | 82.3                   |
| KP7-19      | ST307        | wzi       | wzi-3            | 84               | 84               | 84               | 84                     |

| Strain name | MLST profile | Gene name  | Primer pair name | Melting T 1 (°C) | Melting T 2 (°C) | Melting T 3 (°C) | Average melting T (°C) |
|-------------|--------------|------------|------------------|------------------|------------------|------------------|------------------------|
| KP65-18-3   | ST101        | <i>wzi</i> | <i>wzi-4</i>     | 83.5             | 83.5             | 83               | 83.3                   |
| KP8-19      | ST101        | <i>wzi</i> | <i>wzi-4</i>     | 83.5             | 83.5             | 83               | 83.3                   |
| KP9-19      | ST307        | <i>wzi</i> | <i>wzi-4</i>     | 82.5             | 82.5             | 82.5             | 82.5                   |
| KP9-19      | ST307        | <i>wzi</i> | <i>wzi-3</i>     | 84               | 84               | 84               | 84                     |
| KP925       | ST11         | <i>wzi</i> | <i>wzi-4</i>     | 83.5             | 83.5             | 83.5             | 83.5                   |
| KP925       | ST11         | <i>wzi</i> | <i>wzi-3</i>     | 85               | 85               | 85               | 85                     |

**Table S2.** P-values of the Wilcoxon test (with Holm post-hoc correction) comparison of the average temperature distance matrices among the ten primer pairs used in this work.

|               | <i>infB-1</i> | <i>mdh-1</i>  | <i>phoE-1</i> | <i>rpoB-1</i> | <i>tonB-1</i> | <i>tonB-2</i> | <i>gapA-1</i> | <i>pgi-1</i> | <i>wzi-3</i>  |
|---------------|---------------|---------------|---------------|---------------|---------------|---------------|---------------|--------------|---------------|
| <i>mdh-1</i>  | 1.00000 (n.s) |               |               |               |               |               |               |              |               |
| <i>phoE-1</i> | 0.04820 (*)   | 1.00000 (n.s) |               |               |               |               |               |              |               |
| <i>rpoB-1</i> | 2.3e08 (****) | 0.00079 (***) | 0.00097 (***) |               |               |               |               |              |               |
| <i>tonB-1</i> | 1.00000 (n.s) | 1.00000 (n.s) | 1.00000 (n.s) | 0.00099 (***) |               |               |               |              |               |
| <i>tonB-2</i> | 1.00000 (n.s) | 1.00000 (n.s) | 1.00000 (n.s) | 0.00050 (**)  | 1.00000 (n.s) |               |               |              |               |
| <i>gapA-1</i> | 6.9e06 (****) | 0.02344 (*)   | 0.07846 (n.s) | 1.00000 (n.s) | 0.03806 (*)   | 0.02619 (*)   |               |              |               |
| <i>pgi-1</i>  | 9.0e16 (****) | 9.9e09 (****) | 3.6e11 (****) | 0.04058 (*)   | 3.9e09 (****) | 4.8e10 (****) | 0.00099 (***) |              |               |
| <i>wzi-3</i>  | 0.00010 (**)  | 0.00013 (**)  | 3.6e06 (****) | 1.7e11 (****) | 0.00204 (**)  | 0.00318 (**)  | 2.8e10 (****) | <2e16 (****) |               |
| <i>wzi-4</i>  | 0.07276 (n.s) | 0.02344 (*)   | 1.4e06 (****) | 4.8e13 (****) | 0.01799 (*)   | 0.01594 (*)   | 2.3e10 (****) | <2e16 (****) | 0.11752 (n.s) |

**Table S3.** Features and references of the 82 *Klebsiella pneumoniae* strains used in this work.

| Strain name | Collection | MLST profile | <i>wzi</i> allele | K-type | Reference           | Sequence Read Archive | Hospital                               |
|-------------|------------|--------------|-------------------|--------|---------------------|-----------------------|----------------------------------------|
| 17PV        | Background | ST307        | <i>wzi_173</i>    | KL102  | Gaiarsa et al. 2015 | ERS480608             | San Matteo Hospital (Pavia)            |
| 51BG        | Background | ST162_6      | <i>wzi_417</i>    | KL151  | Gaiarsa et al. 2015 | ERS480639             | Papa Giovanni XXIII hospital (Bergamo) |
| 52BG        | Background | ST10         | <i>wzi_95</i>     | KL20   | Gaiarsa et al. 2015 | ERS480640             | Papa Giovanni XXIII hospital (Bergamo) |
| 53BG        | Background | ST321        | <i>wzi_131</i>    | KL3    | Gaiarsa et al. 2015 | ERS480641             | Papa Giovanni XXIII hospital (Bergamo) |
| 63BG        | Background | ST162_7      | <i>wzi_418</i>    | KL48   | Gaiarsa et al. 2015 | ERS480649             | Papa Giovanni XXIII hospital (Bergamo) |
| 15PV        | Background | ST976        | <i>wzi_415</i>    | KL54   | Gaiarsa et al. 2015 | ERS480606             | San Matteo Hospital (Pavia)            |
| 49BG        | Background | ST147        | <i>wzi_56</i>     | KL55   | Gaiarsa et al. 2015 | ERS480637             | Papa Giovanni XXIII hospital (Bergamo) |
| 21PV        | Background | ST240        | <i>wzi_321</i>    | KL61   | Gaiarsa et al. 2015 | ERS480661             | San Matteo Hospital (Pavia)            |

|               |            |       |         |              |                     |            |                                        |
|---------------|------------|-------|---------|--------------|---------------------|------------|----------------------------------------|
| 55BG          | Background | ST466 | wzi_37  | Undetermined | Gaiarsa et al. 2015 | ERS480643  | Papa Giovanni XXIII hospital (Bergamo) |
| KP261         | Background | ST258 | wzi_29  | KL106        | Gona et al. 2019    | SRX6820068 | San Raffaele hospital (Milan)          |
| KP123         | Background | ST512 | wzi_154 | KL107        | Gona et al. 2019    | SRX6820115 | San Raffaele hospital (Milan)          |
| KP359         | Background | ST149 | wzi_62  | KL62         | Gona et al. 2019    | SRX6820077 | San Raffaele hospital (Milan)          |
| KP248         | Background | ST423 | wzi_8   | Undetermined | Gona et al. 2019    | SRX6820129 | San Raffaele hospital (Milan)          |
| KP366         | Background | ST11  | wzi_75  | Undetermined | Gona et al. 2019    | SRX6820117 | San Raffaele hospital (Milan)          |
| KP469         | Background | ST395 | wzi_2   | Undetermined | Gona et al. 2019    | SRX6820062 | San Raffaele hospital (Milan)          |
| KP473         | Background | ST101 | wzi_137 | Undetermined | Gona et al. 2019    | SRX6820096 | San Raffaele hospital (Milan)          |
| KP485         | Background | ST15  | wzi_89  | Undetermined | Gona et al. 2019    | SRX6820105 | San Raffaele hospital (Milan)          |
| BG-Kpn-101-19 | Validation | ST15  | wzi_24  | KL24         | This work           | ERS4238606 | Papa Giovanni XXIII hospital (Bergamo) |
| BG-Kpn-103-19 | Validation | ST15  | wzi_24  | KL24         | This work           | ERS4238607 | Papa Giovanni XXIII hospital (Bergamo) |
| BG-Kpn-20-18  | Outbreak   | ST512 | wzi_154 | KL107        | This work           | ERS4238608 | Papa Giovanni XXIII hospital (Bergamo) |
| BG-Kpn-21-18  | Outbreak   | ST512 | wzi_154 | KL107        | This work           | ERS4238609 | Papa Giovanni XXIII hospital (Bergamo) |
| BG-Kpn-22-18  | Outbreak   | ST307 | wzi_173 | KL102        | This work           | ERS4238610 | Papa Giovanni XXIII hospital (Bergamo) |
| BG-Kpn-23-18  | Outbreak   | ST512 | wzi_154 | KL107        | This work           | ERS4238611 | Papa Giovanni XXIII hospital (Bergamo) |
| BG-Kpn-24-18  | Outbreak   | ST512 | wzi_154 | KL107        | This work           | ERS4238612 | Papa Giovanni XXIII hospital (Bergamo) |
| BG-Kpn-25-18  | Outbreak   | ST512 | wzi_154 | KL107        | This work           | ERS4238613 | Papa Giovanni XXIII hospital (Bergamo) |
| BG-Kpn-26-18  | Outbreak   | ST512 | wzi_154 | KL107        | This work           | ERS4238614 | Papa Giovanni XXIII hospital (Bergamo) |
| BG-Kpn-27-18  | Outbreak   | ST512 | wzi_154 | KL107        | This work           | ERS4238615 | Papa Giovanni XXIII hospital (Bergamo) |
| BG-Kpn-28-18  | Outbreak   | ST512 | wzi_154 | KL107        | This work           | ERS4238616 | Papa Giovanni XXIII hospital (Bergamo) |
| 54BG          | Validation | ST258 | wzi_29  | KL106        | Gaiarsa et al. 2015 | ERS480642  | Papa Giovanni XXIII hospital (Bergamo) |
| 56BG          | Validation | ST258 | wzi_29  | KL106        | Gaiarsa et al. 2015 | ERS480644  | Papa Giovanni XXIII hospital (Bergamo) |
| 57BG          | Validation | ST258 | wzi_29  | Undetermined | Gaiarsa et al. 2015 | ERS480645  | Papa Giovanni XXIII hospital (Bergamo) |
| KP232         | Validation | ST258 | wzi_154 | KL107        | Gona et al. 2019    | SRX6820131 | San Raffaele hospital (Milan)          |
| KP252         | Validation | ST258 | wzi_154 | KL107        | Gona et al. 2019    | SRX6820065 | San Raffaele hospital (Milan)          |
| KP488         | Validation | ST258 | wzi_154 | KL107        | Gona et al. 2019    | SRX6820136 | San Raffaele hospital (Milan)          |
| KP246         | Validation | ST258 | wzi_29  | Undetermined | Gona et al. 2019    | SRX6820130 | San Raffaele hospital (Milan)          |
| BG-Kpn-29-18  | Outbreak   | ST512 | wzi_154 | KL107        | This work           | ERS4238617 | Papa Giovanni XXIII hospital (Bergamo) |
| BG-Kpn-30-18  | Outbreak   | ST512 | wzi_154 | KL107        | This work           | ERS4238618 | Papa Giovanni XXIII hospital (Bergamo) |
| KP1-19        | Validation | ST101 | wzi_137 | KL17         | This work           | ERS4238621 | San Raffaele hospital (Milan)          |
| KP108-18-2    | Validation | ST512 | wzi_154 | KL107        | This work           | ERS4238619 | San Raffaele hospital (Milan)          |



|           |            |       |         |              |           |            |                               |
|-----------|------------|-------|---------|--------------|-----------|------------|-------------------------------|
| KP11-19   | Validation | ST512 | wzi_154 | KL107        | This work | ERS4238620 | San Raffaele hospital (Milan) |
| KP12-19   | Validation | ST512 | wzi_154 | KL107        | This work | ERS4238623 | San Raffaele hospital (Milan) |
| KP12-19-2 | Validation | ST512 | wzi_154 | KL107        | This work | ERS4238622 | San Raffaele hospital (Milan) |
| KP13-19   | Validation | ST307 | wzi_173 | KL102        | This work | ERS4238624 | San Raffaele hospital (Milan) |
| KP14-19   | Validation | ST512 | wzi_154 | KL107        | This work | ERS4238625 | San Raffaele hospital (Milan) |
| KP15-19   | Validation | ST307 | wzi_173 | KL102        | This work | ERS4238626 | San Raffaele hospital (Milan) |
| KP17-19   | Validation | ST101 | wzi_137 | KL17         | This work | ERS4238627 | San Raffaele hospital (Milan) |
| KP18-19   | Validation | ST101 | wzi_137 | KL17         | This work | ERS4238628 | San Raffaele hospital (Milan) |
| KP19-19   | Validation | ST512 | wzi_154 | KL107        | This work | ERS4238629 | San Raffaele hospital (Milan) |
| KP2-19    | Validation | ST307 | wzi_173 | KL102        | This work | ERS4238632 | San Raffaele hospital (Milan) |
| KP20-19   | Validation | ST258 | wzi_29  | KL106        | This work | ERS4238630 | San Raffaele hospital (Milan) |
| KP21-19   | Validation | ST258 | wzi_29  | Undetermined | This work | ERS4238631 | San Raffaele hospital (Milan) |
| KP24-19   | Validation | ST512 | wzi_154 | KL107        | This work | ERS4238633 | San Raffaele hospital (Milan) |
| KP25-19   | Validation | ST307 | wzi_173 | Undetermined | This work | ERS4238634 | San Raffaele hospital (Milan) |
| KP26-19   | Validation | ST307 | wzi_173 | KL102        | This work | ERS4238635 | San Raffaele hospital (Milan) |
| KP27-19   | Validation | ST307 | wzi_173 | KL102        | This work | ERS4238636 | San Raffaele hospital (Milan) |
| KP29-19   | Validation | ST512 | wzi_154 | KL107        | This work | ERS4238637 | San Raffaele hospital (Milan) |
| KP3-19    | Validation | ST307 | wzi_173 | KL102        | This work | ERS4238638 | San Raffaele hospital (Milan) |
| KP34-19   | Validation | ST101 | wzi_137 | KL17         | This work | ERS4238639 | San Raffaele hospital (Milan) |
| KP35-19   | Validation | ST307 | wzi_173 | KL102        | This work | ERS4238640 | San Raffaele hospital (Milan) |
| KP36-19   | Validation | ST101 | wzi_137 | KL17         | This work | ERS4238641 | San Raffaele hospital (Milan) |
| KP37-19   | Validation | ST307 | wzi_173 | KL102        | This work | ERS4238642 | San Raffaele hospital (Milan) |
| KP38-19   | Validation | ST101 | wzi_137 | KL17         | This work | ERS4238643 | San Raffaele hospital (Milan) |
| KP4-19    | Validation | ST101 | wzi_137 | Undetermined | This work | ERS4238646 | San Raffaele hospital (Milan) |
| KP40-19   | Validation | ST307 | wzi_173 | KL102        | This work | ERS4238644 | San Raffaele hospital (Milan) |
| KP41-19   | Validation | ST307 | wzi_173 | KL102        | This work | ERS4238645 | San Raffaele hospital (Milan) |
| KP43-19   | Validation | ST101 | wzi_137 | KL17         | This work | ERS4238647 | San Raffaele hospital (Milan) |
| KP44-19   | Validation | ST307 | wzi_173 | KL102        | This work | ERS4238648 | San Raffaele hospital (Milan) |
| KP46-19   | Validation | ST307 | wzi_173 | Undetermined | This work | ERS4238649 | San Raffaele hospital (Milan) |
| KP49-19   | Validation | ST512 | wzi_154 | KL107        | This work | ERS4238650 | San Raffaele hospital (Milan) |
| KP5-19    | Validation | ST307 | wzi_173 | KL102        | This work | ERS4238652 | San Raffaele hospital (Milan) |

|           |            |       |         |              |           |            |                               |
|-----------|------------|-------|---------|--------------|-----------|------------|-------------------------------|
| KP51-19   | Validation | ST11  | wzi_24  | KL24         | This work | ERS4238651 | San Raffaele hospital (Milan) |
| KP54-19   | Validation | ST258 | wzi_29  | Undetermined | This work | ERS4238653 | San Raffaele hospital (Milan) |
| KP56-19   | Validation | ST512 | wzi_154 | KL107        | This work | ERS4238654 | San Raffaele hospital (Milan) |
| KP57-19   | Validation | ST512 | wzi_154 | KL107        | This work | ERS4238655 | San Raffaele hospital (Milan) |
| KP58-19   | Validation | ST101 | wzi_137 | Undetermined | This work | ERS4238656 | San Raffaele hospital (Milan) |
| KP59-19   | Validation | ST512 | wzi_154 | KL107        | This work | ERS4238657 | San Raffaele hospital (Milan) |
| KP6-19    | Validation | ST307 | wzi_173 | Undetermined | This work | ERS4238658 | San Raffaele hospital (Milan) |
| KP65-18-3 | Validation | ST101 | wzi_137 | KL17         | This work | ERS4238659 | San Raffaele hospital (Milan) |
| KP7-19    | Validation | ST307 | wzi_173 | Undetermined | This work | ERS4238660 | San Raffaele hospital (Milan) |
| KP8-19    | Validation | ST101 | wzi_137 | Undetermined | This work | ERS4238661 | San Raffaele hospital (Milan) |
| KP9-19    | Validation | ST307 | wzi_173 | Undetermined | This work | ERS4238662 | San Raffaele hospital (Milan) |
| KP925     | Validation | ST11  | wzi_24  | KL24         | This work | ERS4238663 | San Raffaele hospital (Milan) |

**Table S4.** Clinical information of the outbreak strains.

| Strain name  | Isolation date (yyyy/mm/dd) | Ward                                | Material    |
|--------------|-----------------------------|-------------------------------------|-------------|
| BG-Kpn-20-18 | 2018/04/10                  | Infectious Diseases                 | Rectal swab |
| BG-Kpn-21-18 | 2018/04/10                  | Infectious Diseases                 | Rectal swab |
| BG-Kpn-22-18 | 2018/04/11                  | Oncology                            | Rectal swab |
| BG-Kpn-23-18 | 2018/04/15                  | Oncology                            | Rectal swab |
| BG-Kpn-24-18 | 2018/04/16                  | Infectious Diseases                 | Pus         |
| BG-Kpn-25-18 | 2018/04/17                  | Oncology                            | Rectal swab |
| BG-Kpn-26-18 | 2018/04/20                  | Cardio-Surgical Intensive Care unit | Blood       |
| BG-Kpn-27-18 | 2018/04/24                  | Infectious Diseases                 | Rectal swab |
| BG-Kpn-28-18 | 2018/04/24                  | Infectious Diseases                 | Urine       |
| BG-Kpn-29-18 | 2018/04/24                  | Oncology                            | Rectal swab |
| BG-Kpn-30-18 | 2018/04/26                  | Cardio-Surgical Intensive Care unit | Rectal swab |

### Boxplots comparison

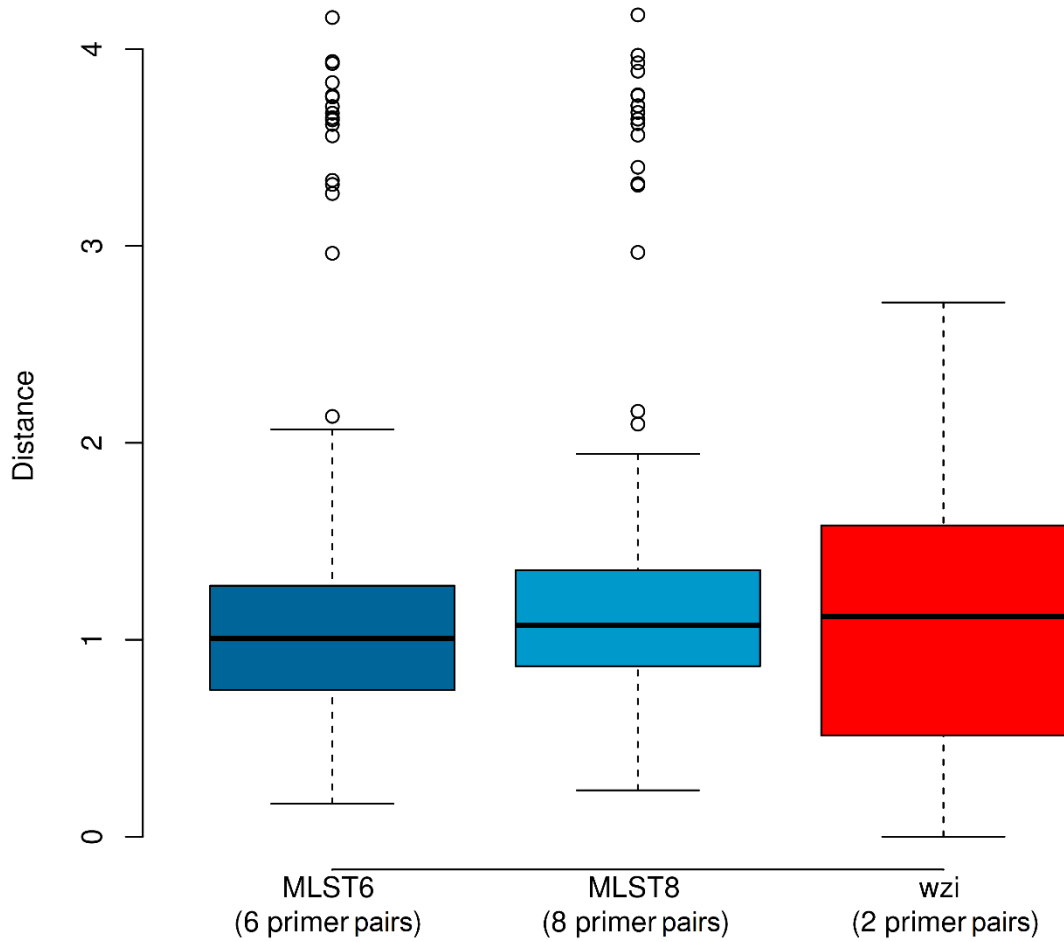

**Figure S3.** Distribution of the average melting temperature difference among the 17 *K. pneumoniae* strains for the three primer schemes. Boxes are the 25th and 75th quartiles divided by the medians, whiskers are 1.5x the interquartile ranges and dots are outliers.

## Phylogenetic tree outbreak strains

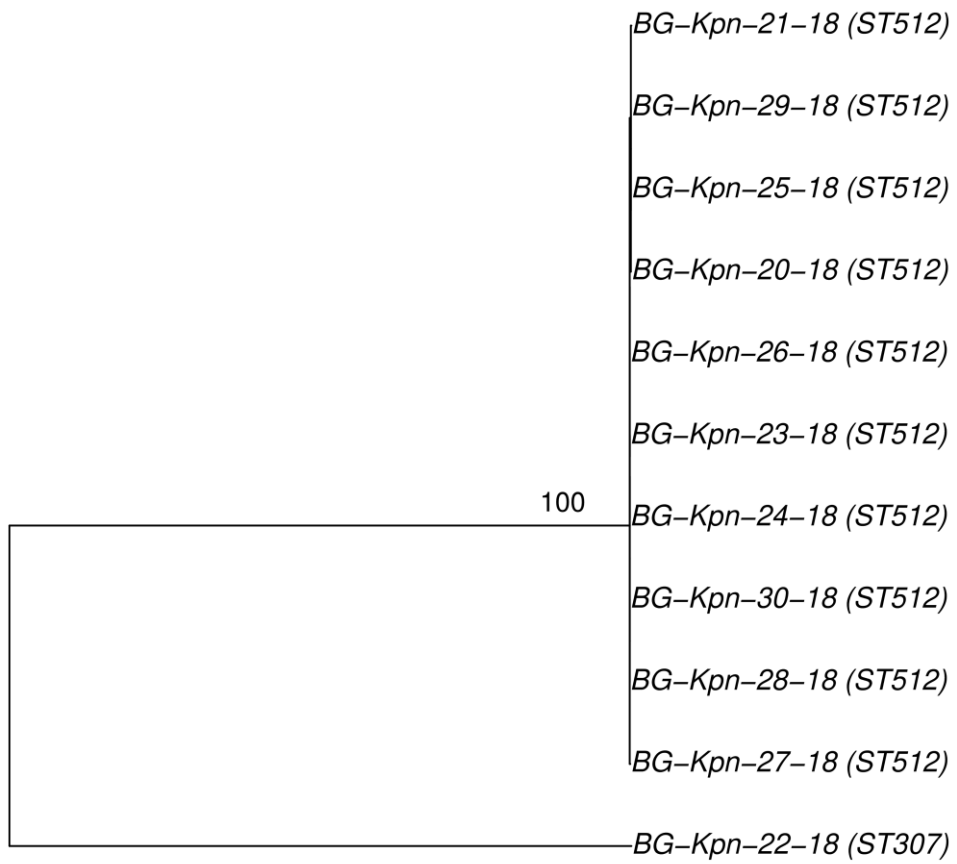

**Figure S4.** Maximum Likelihood phylogenetic tree of the 11 outbreak strains. The tree was obtained from an alignment of 66 core-SNPs

## Dendrogram MLST6

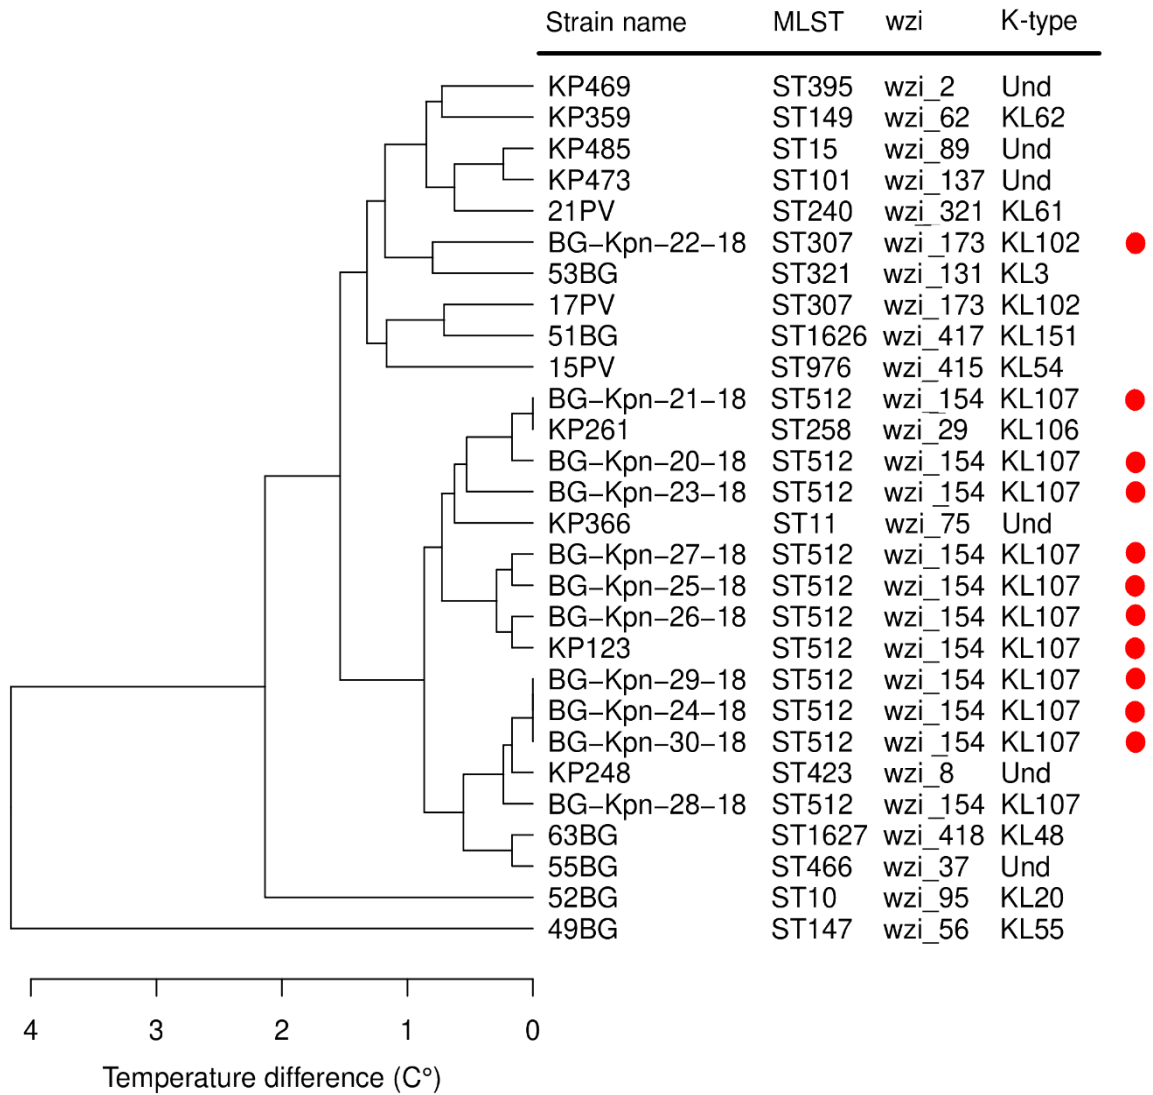

**Figure S5.** Dendrogram of the hierarchical clustering analysis on the average temperature distance matrix obtained using the MLST6 scheme. The 17 “background” strains belonging to 17 different MLSTs are written in black, while the 11 strains isolated during the nosocomial outbreak are highlighted by a red dot.

## Dendrogram MLST8

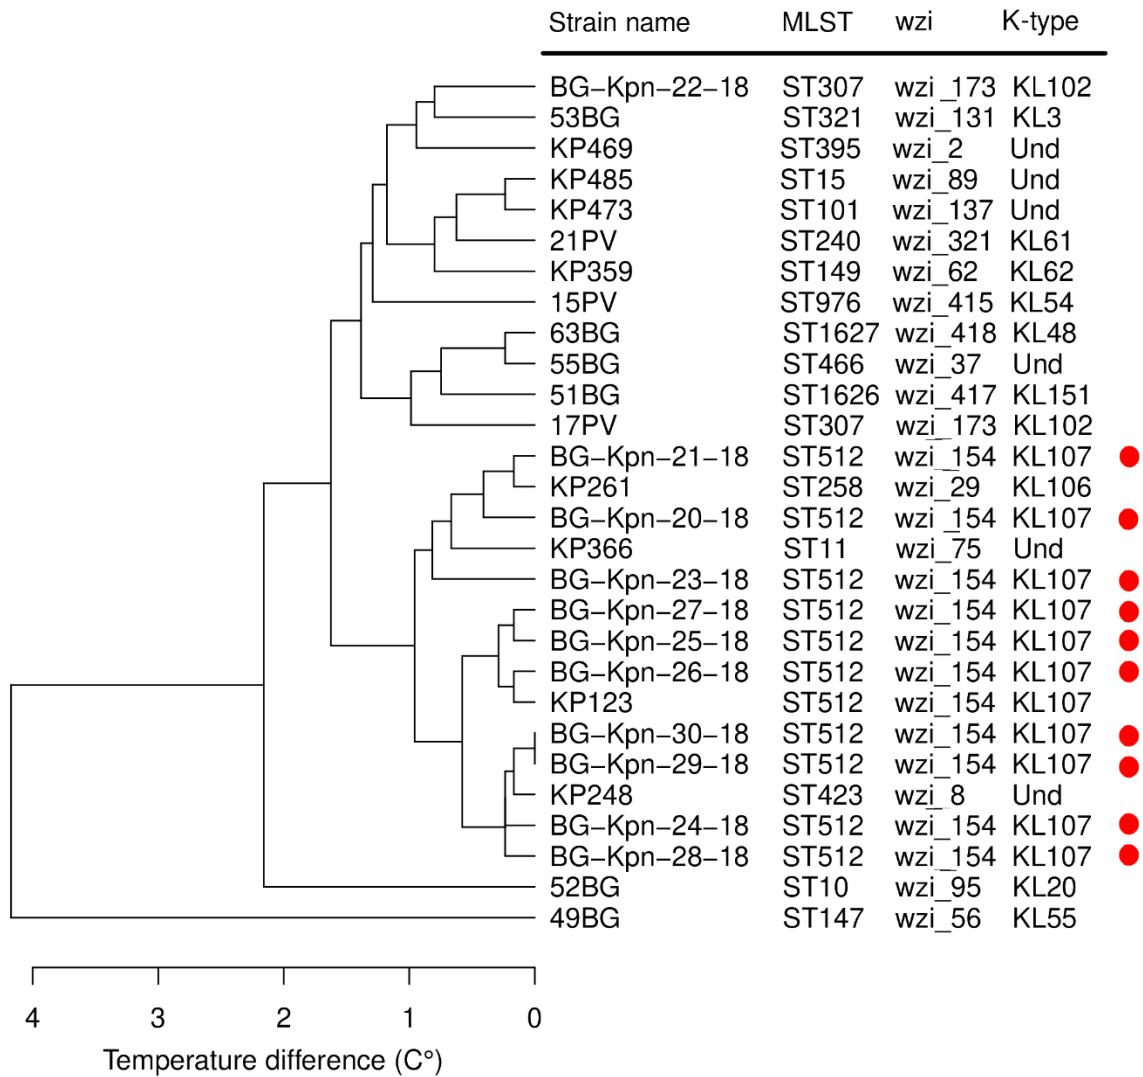

**Figure S6.** Dendrogram of the hierarchical clustering analysis on the average temperature distance matrix obtained using the MLST8 scheme. The 17 “background” strains belonging to 17 different MLSTs are written in black, while the 11 strains isolated during the nosocomial outbreak are highlighted by a red dot.

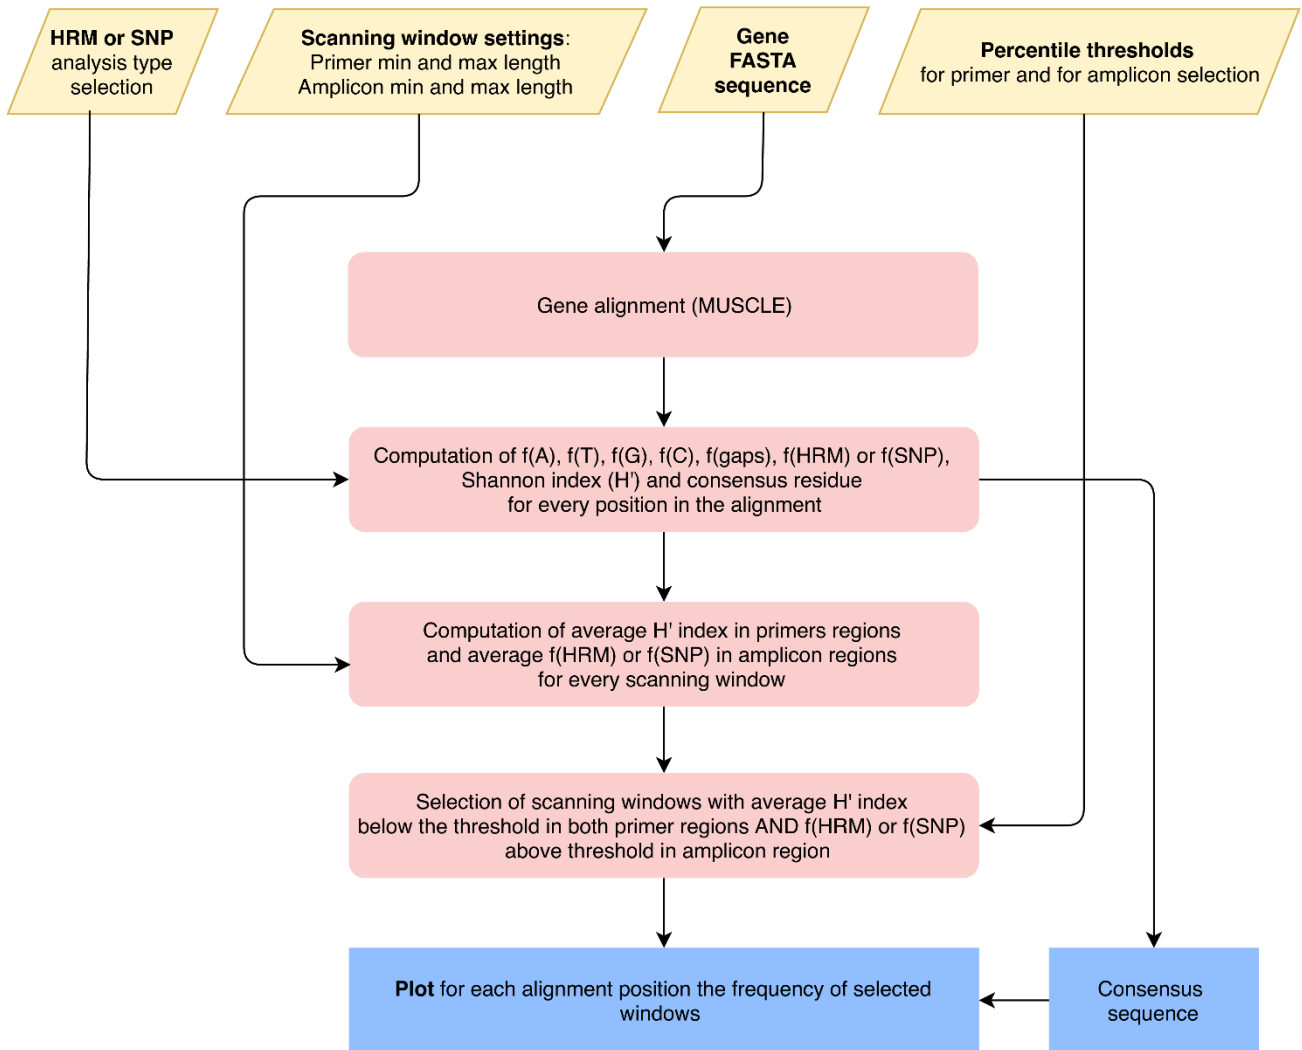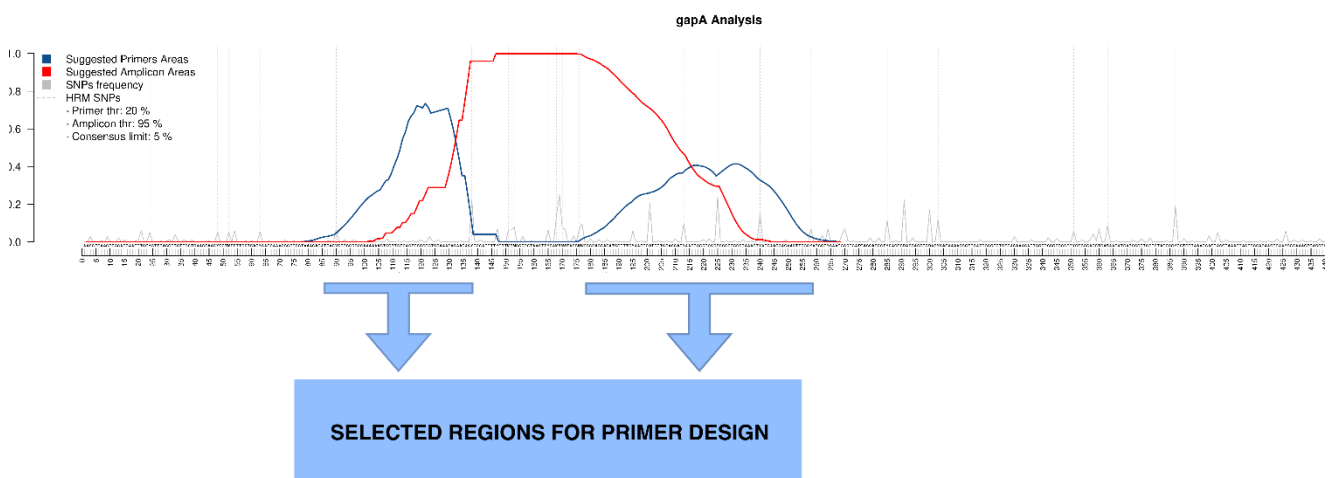

**Figure S7.** The diagram summarizes the main steps of the algorithm of EasyPrimer and shows an example of output
